# Supplementary figures and images for: Economical, facile synthesis of network-like carbon nanosheets and their use as an enhanced electrode material for sensitive detection of ascorbic acid
Source: Royal Society of Chemistry journal article supplement (doi:10.1039/c6ra28805g), 2017-01-01

### Supplementary Figure

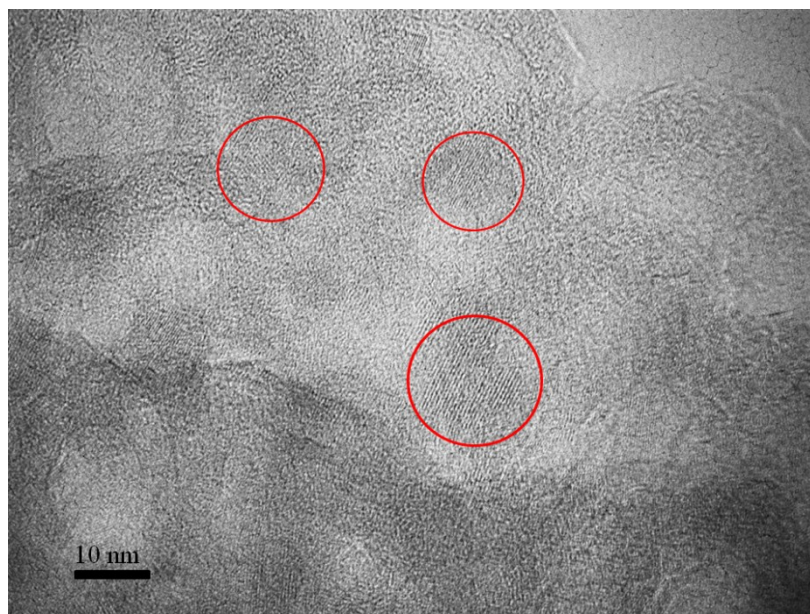

**Fig. S1.** The TEM image of NCN

Supplement: c6ra28805g1.pdf [file c6ra28805g1.pdf]
